# Supplementary material for: Accurately predicting solvation free energy in aqueous and organic solvents beyond 298 K by combining deep learning and the 1D reference interaction site model
Source: Royal Society of Chemistry journal article supplement (doi:10.1039/d2dd00103a), 2022-12-14
Supplement: d2dd00103a1.pdf [file d2dd00103a1.pdf]

## Supporting Information for "Accurately Predicting Solvation Free Energy in Aqueous and Organic Solvents beyond 298K by Combining Deep Learning and The 1D Reference Interaction Site Model"

Daniel J. Fowles, Rose G. McHardy, Abdullah Ahmad, David S. Palmer\*

\* Department of Pure and Applied Chemistry, University of Strathclyde, Thomas Graham Building, 295 Cathedral Street, Glasgow, Scotland G1 1XL, U.K.; E-mail: david.palmer@strath.ac.uk

### 1 Solvation Free Energy Densities

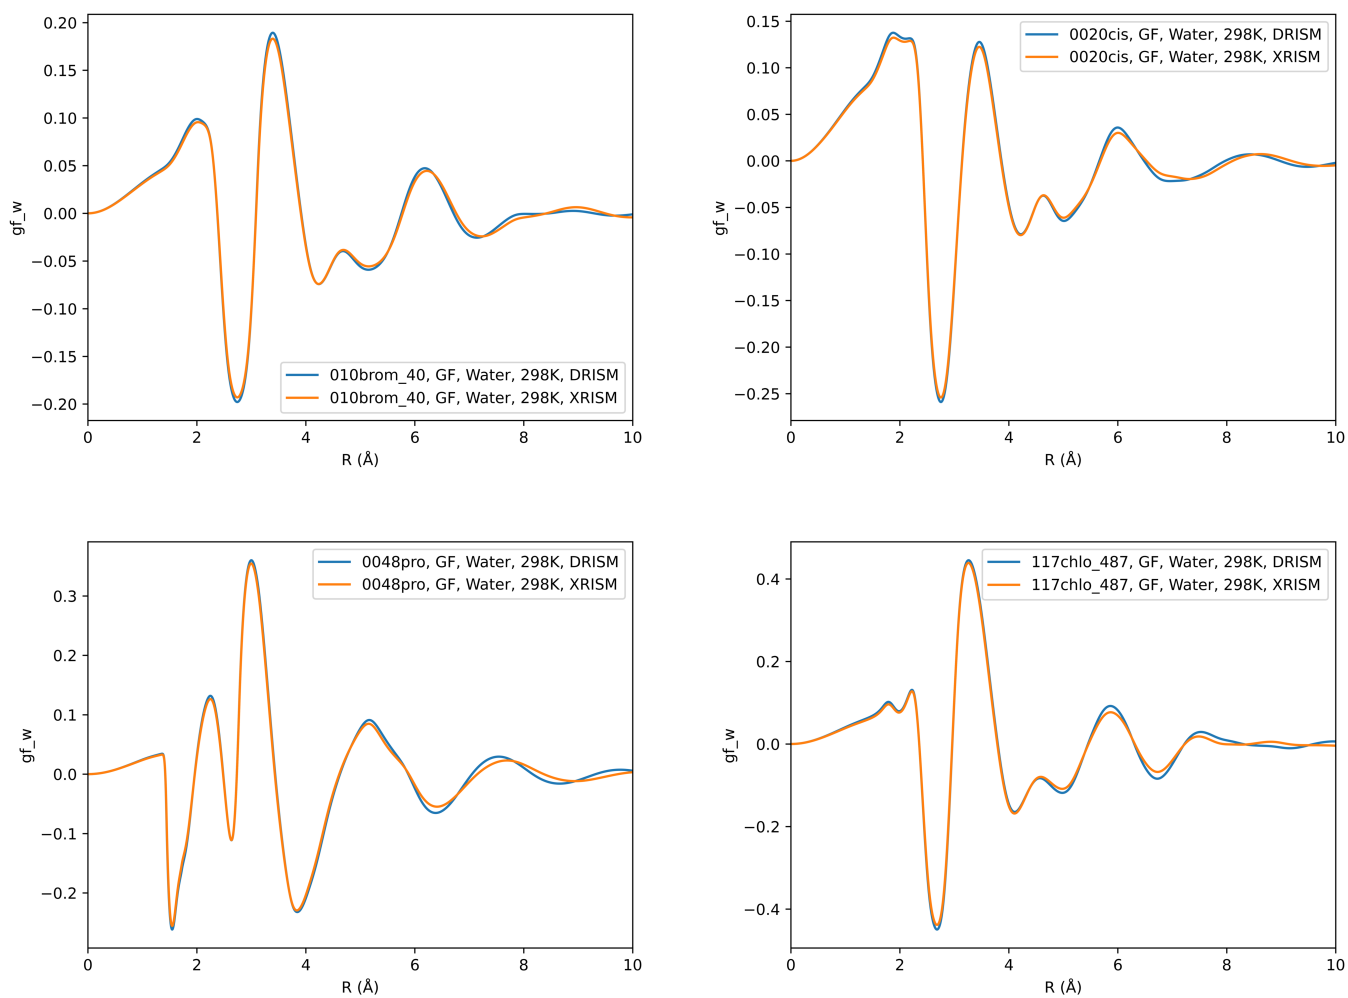

**Figure 1** Comparison of the effects of DRISM and XRISM on SFED magnitude and shape. Descriptors were generated using the GF functional and GAFF parameters.

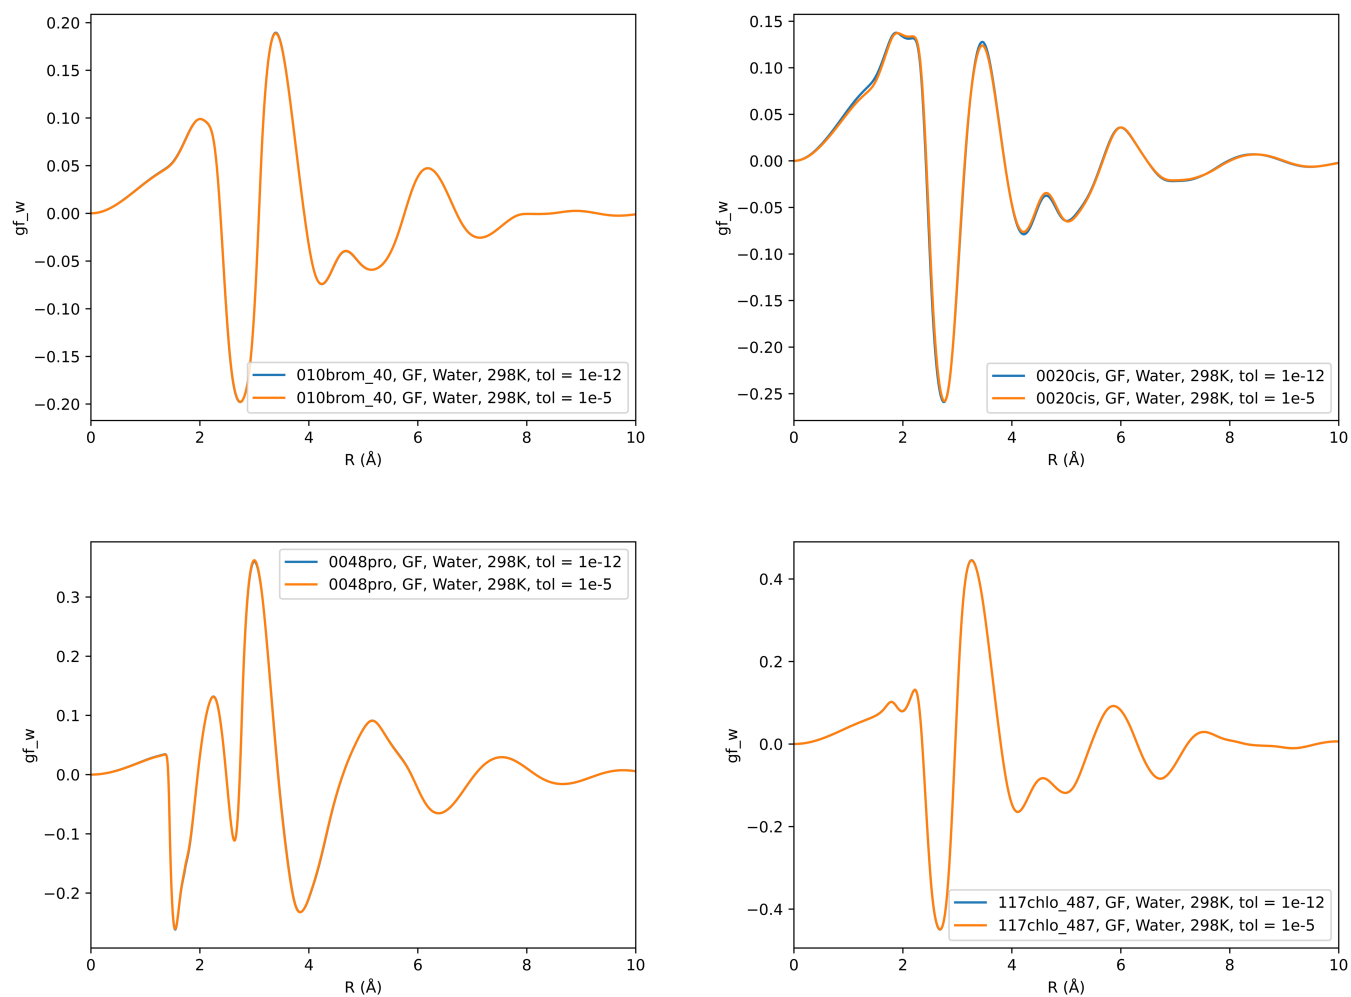

**Figure 2** Comparison of the effects of convergence tolerance on SFED magnitude and shape. Descriptors were generated using the GF functional and GAFF parameters.

## 2 Convolutional Neural Network

| Single Optimisation Method    |          |              |            |            | GAFF           |            |            |            |
|-------------------------------|----------|--------------|------------|------------|----------------|------------|------------|------------|
| Solvent                       | Temp.    | Temp. Descr. | Functional | Datapoints | R <sup>2</sup> | RMSE       | Bias       | SDEP       |
| Multi-solvent                 | 273-373K | No           | KH         | 3629       | 0.93(0.04)     | 0.98(0.26) | 0.10(0.16) | 0.97(0.25) |
|                               |          |              | HNC        |            | 0.92(0.04)     | 1.07(0.25) | 0.11(0.14) | 1.05(0.25) |
|                               |          |              | GF         |            | 0.94(0.04)     | 0.95(0.24) | 0.09(0.15) | 0.94(0.24) |
| Separate Optimisation Methods |          |              |            |            | GAFF           |            |            |            |
| Solvent                       | Temp.    | Temp. Descr. | Functional | Datapoints | R <sup>2</sup> | RMSE       | Bias       | SDEP       |
| Multi-solvent                 | 273-373K | No           | KH         | 3629       | 0.93(0.03)     | 1.01(0.21) | 0.10(0.14) | 1.00(0.20) |
|                               |          |              | HNC        |            | 0.93(0.05)     | 1.00(0.29) | 0.09(0.14) | 0.98(0.29) |
|                               |          |              | GF         |            | 0.94(0.04)     | 0.97(0.28) | 0.04(0.16) | 0.96(0.27) |

**Table 1** Solvation free energy predictions taken from CNN models using KH, HNC and GF calculated descriptors with GAFF parameters. Two separate optimisation methods are shown. The single method performed a conformational search using a weighted rotor search with the GAFF forcefield on all solute geometries. The lowest energy conformer for each solute was used in 1D-RISM calculations to generate SFED datasets. The separate optimisation method used a different procedure for the MSD and Chamberlin *et al.* datasets. The full breakdown of the different methods can be found in Section 3.1 of the manuscript.

| KH            |          |              |            | GAFF           |      |       |      | OPLS           |      |       |      |
|---------------|----------|--------------|------------|----------------|------|-------|------|----------------|------|-------|------|
| Solvent       | Temp.    | Temp. Descr. | Datapoints | R <sup>2</sup> | RMSE | Bias  | SDEP | R <sup>2</sup> | RMSE | Bias  | SDEP |
| Chloroform    | 298K     | No           | 79         | 0.87           | 0.66 | 0.03  | 0.59 | 0.90           | 0.64 | 0.03  | 0.59 |
| Carbon Tet.   | 298K     | No           | 109        | 0.88           | 0.40 | 0.00  | 0.34 | 0.88           | 0.42 | -0.00 | 0.34 |
| Water         | 298K     | No           | 521        | 0.98           | 0.59 | 0.00  | 0.58 | 0.98           | 0.52 | 0.01  | 0.51 |
|               | 273-373K | No           | 3053       | 0.95           | 0.51 | -0.03 | 0.49 | 0.94           | 0.57 | -0.02 | 0.55 |
|               | 273-373K | Yes          | 3053       | 0.97           | 0.44 | -0.01 | 0.42 | 0.39           | 0.61 | -0.01 | 0.59 |
| Multi-solvent | 298K     | No           | 709        | 0.96           | 0.70 | 0.02  | 0.67 | 0.97           | 0.63 | -0.01 | 0.61 |
|               | 273-373K | No           | 3241       | 0.93           | 0.57 | -0.03 | 0.55 | 0.94           | 0.59 | -0.03 | 0.58 |
|               | 273-373K | Yes          | 3241       | 0.95           | 0.55 | -0.02 | 0.54 | 0.92           | 0.61 | -0.02 | 0.60 |
|               | 273-373K | No           | 3629       | 0.53           | 0.97 | -0.04 | 0.94 | 0.78           | 0.98 | -0.05 | 0.96 |
|               | 273-373K | Yes          | 3629       | 0.94           | 0.75 | 0.05  | 0.73 | 0.46           | 0.98 | -0.04 | 0.96 |
| HNC           |          |              |            | GAFF           |      |       |      | OPLS           |      |       |      |
| Solvent       | Temp.    | Temp. Descr. | Datapoints | R <sup>2</sup> | RMSE | Bias  | SDEP | R <sup>2</sup> | RMSE | Bias  | SDEP |
| Chloroform    | 298K     | No           | 79         | 0.89           | 0.67 | 0.04  | 0.60 | 0.89           | 0.66 | -0.01 | 0.60 |
| Carbon Tet.   | 298K     | No           | 109        | 0.92           | 0.38 | -0.01 | 0.32 | 0.84           | 0.39 | 0.02  | 0.31 |
| Water         | 298K     | No           | 521        | 0.98           | 0.58 | -0.03 | 0.56 | 0.98           | 0.52 | 0.00  | 0.51 |
|               | 273-373K | No           | 3053       | 0.90           | 0.52 | -0.01 | 0.51 | 0.90           | 0.58 | -0.04 | 0.57 |
|               | 273-373K | Yes          | 3053       | 0.52           | 0.62 | -0.03 | 0.61 | 0.89           | 0.56 | -0.00 | 0.55 |
| Multi-solvent | 298K     | No           | 709        | 0.96           | 0.71 | 0.03  | 0.69 | 0.97           | 0.64 | 0.04  | 0.62 |
|               | 273-373K | No           | 3241       | 0.95           | 0.54 | -0.02 | 0.53 | 0.94           | 0.57 | -0.03 | 0.56 |
|               | 273-373K | Yes          | 3241       | 0.68           | 0.61 | -0.01 | 0.60 | 0.94           | 0.57 | -0.03 | 0.55 |
|               | 273-373K | No           | 3629       | 0.87           | 0.81 | -0.09 | 0.78 | 0.89           | 0.87 | -0.07 | 0.85 |
|               | 273-373K | Yes          | 3629       | 0.90           | 0.77 | 0.04  | 0.75 | 0.91           | 0.84 | -0.05 | 0.82 |
| GF            |          |              |            | GAFF           |      |       |      | OPLS           |      |       |      |
| Solvent       | Temp.    | Temp. Descr. | Datapoints | R <sup>2</sup> | RMSE | Bias  | SDEP | R <sup>2</sup> | RMSE | Bias  | SDEP |
| Chloroform    | 298K     | No           | 79         | 0.90           | 0.63 | 0.04  | 0.58 | 0.87           | 0.71 | 0.01  | 0.65 |
| Carbon Tet.   | 298K     | No           | 109        | 0.84           | 0.44 | 0.10  | 0.36 | 0.88           | 0.44 | -0.01 | 0.37 |
| Water         | 298K     | No           | 521        | 0.98           | 0.59 | -0.07 | 0.58 | 0.98           | 0.54 | -0.01 | 0.53 |
|               | 273-373K | No           | 3053       | 0.95           | 0.51 | -0.03 | 0.49 | 0.95           | 0.55 | -0.02 | 0.53 |
|               | 273-373K | Yes          | 3053       | 0.96           | 0.47 | -0.01 | 0.45 | 0.96           | 0.46 | -0.00 | 0.45 |
| Multi-solvent | 298K     | No           | 709        | 0.96           | 0.70 | 0.00  | 0.68 | 0.97           | 0.62 | -0.02 | 0.60 |
|               | 273-373K | No           | 3241       | 0.79           | 0.64 | -0.05 | 0.63 | 0.93           | 0.60 | -0.04 | 0.58 |
|               | 273-373K | Yes          | 3241       | 0.77           | 0.57 | -0.01 | 0.56 | 0.96           | 0.53 | -0.02 | 0.51 |
|               | 273-373K | No           | 3629       | 0.83           | 0.82 | -0.10 | 0.79 | 0.92           | 0.81 | -0.03 | 0.79 |
|               | 273-373K | Yes          | 3629       | 0.94           | 0.72 | -0.08 | 0.70 | 0.93           | 0.80 | -0.05 | 0.78 |

**Table 2** Solvation free energy predictions taken from CNN models using KH, HNC and GF calculated descriptors, OPLS and GAFF parameters and temperature descriptors. Results shown are the average five-fold cross validation test set statistics within each resample, averaged over the number of resamples run for each model. Carbon Tet. refers to Carbon Tetrachloride. Organic solvents were modelled with GAFF parameters, and aqueous solvent was modelled with MSPC/E.

| KH                     |          |              | GAFF       |                |            |             | OPLS       |                |            |             |            |
|------------------------|----------|--------------|------------|----------------|------------|-------------|------------|----------------|------------|-------------|------------|
| Solvent                | Temp.    | Temp. Descr. | Datapoints | R <sup>2</sup> | RMSE       | Bias        | SDEP       | R <sup>2</sup> | RMSE       | Bias        | SDEP       |
| Carbon Tet. Chloroform | 298K     | No           | 79         | 0.93(0.06)     | 0.44(0.15) | 0.06(0.13)  | 0.42(0.14) | 0.91(0.17)     | 0.45(0.21) | 0.03(0.25)  | 0.40(0.13) |
|                        | 298K     | No           | 109        | 0.92(0.05)     | 0.74(0.21) | 0.00(0.19)  | 0.72(0.20) | 0.90(0.08)     | 0.76(0.30) | -0.01(0.15) | 0.75(0.30) |
| Water                  | 298K     | No           | 521        | 0.95(0.03)     | 0.91(0.31) | 0.04(0.22)  | 0.89(0.30) | 0.95(0.05)     | 0.89(0.38) | 0.01(0.27)  | 0.85(0.36) |
|                        | 273-373K | No           | 3053       | 0.93(0.05)     | 0.66(0.24) | -0.01(0.11) | 0.65(0.24) | 0.91(0.08)     | 0.75(0.27) | 0.02(0.13)  | 0.74(0.27) |
| Multi-solvent          | 273-373K | Yes          | 3053       | 0.95(0.05)     | 0.55(0.22) | 0.01(0.09)  | 0.54(0.22) | 0.93(0.07)     | 0.65(0.26) | 0.01(0.12)  | 0.64(0.26) |
|                        | 298K     | No           | 709        | 0.95(0.03)     | 0.83(0.22) | -0.01(0.15) | 0.82(0.22) | 0.95(0.05)     | 0.82(0.32) | -0.02(0.18) | 0.80(0.31) |
| Multi-solvent          | 273-373K | No           | 3241       | 0.88(0.10)     | 0.94(0.26) | 0.08(0.23)  | 0.92(0.25) | 0.89(0.06)     | 0.91(0.20) | 0.03(0.24)  | 0.88(0.18) |
|                        | 273-373K | Yes          | 3241       | 0.88(0.10)     | 0.97(0.28) | 0.06(0.20)  | 0.95(0.27) | 0.87(0.06)     | 1.01(0.23) | 0.03(0.27)  | 0.98(0.21) |
| Multi-solvent          | 273-373K | No           | 3629       | 0.93(0.03)     | 1.01(0.21) | 0.10(0.14)  | 1.00(0.20) | 0.91(0.06)     | 1.12(0.36) | 0.00(0.24)  | 1.10(0.35) |
|                        | 273-373K | Yes          | 3629       | 0.93(0.03)     | 1.03(0.21) | 0.21(0.12)  | 1.00(0.21) | 0.92(0.05)     | 1.06(0.31) | -0.02(0.15) | 1.05(0.31) |
| HNC                    |          |              |            |                |            |             |            |                |            |             |            |
| Solvent                | Temp.    | Temp. Descr. | Datapoints | R <sup>2</sup> | RMSE       | Bias        | SDEP       | R <sup>2</sup> | RMSE       | Bias        | SDEP       |
| Carbon Tet. Chloroform | 298K     | No           | 79         | 0.93(0.06)     | 0.45(0.11) | 0.03(0.14)  | 0.43(0.11) | 0.91(0.12)     | 0.47(0.22) | -0.01(0.17) | 0.44(0.21) |
|                        | 298K     | No           | 109        | 0.89(0.08)     | 0.78(0.27) | -0.00(0.16) | 0.76(0.27) | 0.90(0.08)     | 0.74(0.27) | 0.03(0.17)  | 0.72(0.27) |
| Water                  | 298K     | No           | 521        | 0.94(0.06)     | 0.94(0.39) | -0.14(0.25) | 0.91(0.36) | 0.95(0.06)     | 0.88(0.39) | -0.01(0.24) | 0.85(0.38) |
|                        | 273-373K | No           | 3053       | 0.94(0.04)     | 0.64(0.21) | -0.01(0.09) | 0.63(0.21) | 0.90(0.11)     | 0.75(0.33) | 0.03(0.11)  | 0.74(0.33) |
| Multi-solvent          | 273-373K | Yes          | 3053       | 0.94(0.05)     | 0.57(0.23) | 0.02(0.10)  | 0.56(0.23) | 0.91(0.09)     | 0.71(0.33) | 0.03(0.13)  | 0.70(0.32) |
|                        | 298K     | No           | 709        | 0.95(0.03)     | 0.84(0.22) | 0.06(0.15)  | 0.83(0.22) | 0.95(0.03)     | 0.80(0.26) | 0.02(0.14)  | 0.79(0.26) |
| Multi-solvent          | 273-373K | No           | 3241       | 0.89(0.04)     | 0.93(0.17) | 0.08(0.18)  | 0.90(0.17) | 0.77(0.62)     | 1.15(0.86) | 0.05(0.29)  | 1.11(0.86) |
|                        | 273-373K | Yes          | 3241       | 0.88(0.05)     | 0.98(0.18) | 0.11(0.21)  | 0.95(0.17) | 0.86(0.08)     | 1.04(0.25) | 0.07(0.24)  | 1.01(0.24) |
| Multi-solvent          | 273-373K | No           | 3629       | 0.93(0.05)     | 1.00(0.29) | 0.09(0.14)  | 0.98(0.29) | 0.93(0.04)     | 0.98(0.37) | 0.00(0.14)  | 0.97(0.27) |
|                        | 273-373K | Yes          | 3629       | 0.93(0.04)     | 0.97(0.25) | 0.12(0.11)  | 0.95(0.24) | 0.92(0.05)     | 1.08(0.31) | 0.03(0.17)  | 1.07(0.31) |
| GF                     |          |              |            |                |            |             |            |                |            |             |            |
| Solvent                | Temp.    | Temp. Descr. | Datapoints | R <sup>2</sup> | RMSE       | Bias        | SDEP       | R <sup>2</sup> | RMSE       | Bias        | SDEP       |
| Carbon Tet. Chloroform | 298K     | No           | 79         | 0.91(0.09)     | 0.47(0.20) | 0.05(0.20)  | 0.44(0.17) | 0.90(0.06)     | 0.51(0.17) | -0.01(0.22) | 0.47(0.14) |
|                        | 298K     | No           | 109        | 0.89(0.13)     | 0.80(0.36) | 0.01(0.21)  | 0.77(0.35) | 0.91(0.07)     | 0.73(0.21) | 0.00(0.16)  | 0.72(0.21) |
| Water                  | 298K     | No           | 521        | 0.94(0.04)     | 0.96(0.29) | -0.06(0.32) | 0.91(0.27) | 0.95(0.05)     | 0.88(0.35) | 0.02(0.21)  | 0.86(0.35) |
|                        | 273-373K | No           | 3053       | 0.93(0.08)     | 0.65(0.26) | 0.02(0.14)  | 0.64(0.25) | 0.92(0.06)     | 0.68(0.23) | 0.03(0.09)  | 0.67(0.23) |
| Multi-solvent          | 273-373K | Yes          | 3053       | 0.94(0.05)     | 0.62(0.21) | 0.01(0.09)  | 0.61(0.21) | 0.94(0.05)     | 0.59(0.20) | 0.01(0.07)  | 0.58(0.20) |
|                        | 298K     | No           | 709        | 0.95(0.03)     | 0.87(0.22) | 0.05(0.18)  | 0.85(0.22) | 0.95(0.05)     | 0.77(0.31) | 0.01(0.14)  | 0.76(0.30) |
| Multi-solvent          | 273-373K | No           | 3241       | 0.90(0.05)     | 0.91(0.21) | 0.03(0.20)  | 0.89(0.20) | 0.36(3.42)     | 1.27(1.75) | 0.07(0.39)  | 1.24(1.73) |
|                        | 273-373K | Yes          | 3241       | 0.88(0.06)     | 0.97(0.22) | 0.10(0.23)  | 0.93(0.21) | 0.74(1.02)     | 1.10(1.10) | -0.02(0.26) | 1.07(1.09) |
| Multi-solvent          | 273-373K | No           | 3629       | 0.94(0.04)     | 0.97(0.28) | 0.04(0.16)  | 0.96(0.27) | 0.94(0.04)     | 0.93(0.27) | 0.05(0.21)  | 0.91(0.25) |
|                        | 273-373K | Yes          | 3629       | 0.94(0.04)     | 0.95(0.24) | 0.04(0.12)  | 0.95(0.23) | 0.93(0.05)     | 1.04(0.28) | 0.03(0.20)  | 1.03(0.27) |

**Table 3** Solvation free energy predictions for all solvents using convolutional neural network models trained on KH, HNC and GF calculated descriptors. Predictions are separated by temperature, inclusion of a temperature descriptor, solute forcefield parameters and number of datapoints. Results for each model are taken from test set predictions. Units are in kcal/mol. Carbon Tet. refers to Carbon Tetrachloride. Organic solvents were modelled with GAFF parameters, and water solvent was modelled with MSPC/E. The standard deviation (SD) for each model statistic over 50 resamples is also shown.

### 3 Partial Least Squares

| KH            |          |              |            | GAFF           |      |       |      | OPLS           |      |       |      |
|---------------|----------|--------------|------------|----------------|------|-------|------|----------------|------|-------|------|
| Solvent       | Temp.    | Temp. Descr. | Datapoints | R <sup>2</sup> | RMSE | Bias  | SDEP | R <sup>2</sup> | RMSE | Bias  | SDEP |
| Chloroform    | 298K     | No           | 79         | 0.64           | 1.39 | -0.06 | 1.33 | 0.52           | 1.55 | -0.04 | 1.48 |
| Carbon Tet.   | 298K     | No           | 109        | 0.81           | 0.67 | -0.01 | 0.63 | 0.74           | 0.76 | -0.01 | 0.72 |
| Water         | 298K     | No           | 521        | 0.77           | 1.94 | -0.04 | 1.93 | 0.74           | 2.10 | -0.00 | 2.08 |
|               | 273-373K | No           | 3053       | 0.55           | 1.73 | -0.05 | 1.68 | 0.67           | 1.50 | -0.00 | 1.47 |
|               | 273-373K | Yes          | 3053       | 0.61           | 1.62 | -0.04 | 1.58 | 0.70           | 1.41 | -0.02 | 1.37 |
| Multi-solvent | 298K     | No           | 709        | 0.64           | 2.31 | -0.01 | 2.29 | 0.67           | 2.21 | -0.01 | 2.20 |
|               | 273-373K | No           | 3241       | 0.45           | 1.95 | 0.16  | 1.86 | 0.55           | 1.80 | 0.17  | 1.73 |
|               | 273-373K | Yes          | 3241       | 0.52           | 1.85 | 0.14  | 1.78 | 0.55           | 1.74 | 0.16  | 1.70 |
|               | 273-373K | No           | 3629       | 0.48           | 2.29 | 0.28  | 2.20 | 0.53           | 2.17 | 0.42  | 2.05 |
|               | 273-373K | Yes          | 3629       | 0.52           | 2.21 | 0.21  | 2.15 | 0.55           | 2.13 | 0.37  | 2.03 |
| HNC           |          |              |            | GAFF           |      |       |      | OPLS           |      |       |      |
| Solvent       | Temp.    | Temp. Descr. | Datapoints | R <sup>2</sup> | RMSE | Bias  | SDEP | R <sup>2</sup> | RMSE | Bias  | SDEP |
| Chloroform    | 298K     | No           | 79         | 0.63           | 1.38 | -0.05 | 1.32 | 0.59           | 1.47 | -0.02 | 1.40 |
| Carbon Tet.   | 298K     | No           | 109        | 0.80           | 0.69 | -0.02 | 0.65 | 0.78           | 0.70 | 0.01  | 0.66 |
| Water         | 298K     | No           | 521        | 0.76           | 1.96 | -0.04 | 1.94 | 0.73           | 2.12 | -0.01 | 2.10 |
|               | 273-373K | No           | 3053       | 0.54           | 1.74 | -0.06 | 1.70 | 0.67           | 1.51 | -0.02 | 1.47 |
|               | 273-373K | Yes          | 3053       | 0.60           | 1.65 | -0.06 | 1.61 | 0.70           | 1.40 | -0.03 | 1.37 |
| Multi-solvent | 298K     | No           | 709        | 0.63           | 2.32 | -0.02 | 2.30 | 0.67           | 2.22 | -0.01 | 2.21 |
|               | 273-373K | No           | 3241       | 0.44           | 2.01 | 0.16  | 1.92 | 0.50           | 1.86 | 0.18  | 1.79 |
|               | 273-373K | Yes          | 3241       | 0.48           | 1.90 | 0.16  | 1.82 | 0.54           | 1.77 | 0.16  | 1.70 |
|               | 273-373K | No           | 3629       | 0.46           | 2.33 | 0.30  | 2.23 | 0.52           | 2.21 | 0.42  | 2.08 |
|               | 273-373K | Yes          | 3629       | 0.52           | 2.21 | 0.24  | 2.14 | 0.53           | 2.18 | 0.39  | 2.07 |
| GF            |          |              |            | GAFF           |      |       |      | OPLS           |      |       |      |
| Solvent       | Temp.    | Temp. Descr. | Datapoints | R <sup>2</sup> | RMSE | Bias  | SDEP | R <sup>2</sup> | RMSE | Bias  | SDEP |
| Chloroform    | 298K     | No           | 79         | 0.67           | 1.31 | -0.05 | 1.26 | 0.66           | 1.30 | -0.05 | 1.24 |
| Carbon Tet.   | 298K     | No           | 109        | 0.81           | 0.66 | -0.00 | 0.62 | 0.82           | 0.63 | 0.01  | 0.60 |
| Water         | 298K     | No           | 521        | 0.77           | 1.96 | -0.05 | 1.94 | 0.73           | 2.14 | -0.02 | 2.12 |
|               | 273-373K | No           | 3053       | 0.59           | 1.65 | -0.04 | 1.60 | 0.68           | 1.46 | -0.02 | 1.43 |
|               | 273-373K | Yes          | 3053       | 0.65           | 1.56 | -0.03 | 1.52 | 0.73           | 1.34 | -0.01 | 1.31 |
| Multi-solvent | 298K     | No           | 709        | 0.67           | 2.18 | -0.02 | 2.17 | 0.65           | 2.28 | -0.03 | 2.26 |
|               | 273-373K | No           | 3241       | 0.50           | 1.85 | 0.16  | 1.77 | 0.59           | 1.70 | 0.15  | 1.64 |
|               | 273-373K | Yes          | 3241       | 0.55           | 1.77 | 0.13  | 1.71 | 0.60           | 1.63 | 0.14  | 1.58 |
|               | 273-373K | No           | 3629       | 0.53           | 2.18 | 0.19  | 2.12 | 0.56           | 2.11 | 0.36  | 2.01 |
|               | 273-373K | Yes          | 3629       | 0.54           | 2.14 | 0.17  | 2.09 | 0.58           | 2.07 | 0.34  | 1.98 |

**Table 4** Solvation free energy predictions taken from PLS models using KH, HNC and GF calculated descriptors, OPLS and GAFF parameters and temperature descriptors. Results shown are the average five-fold cross validation test set statistics within each resample, averaged over the number of resamples run for each model. Carbon Tet. refers to Carbon Tetrachloride. Organic solvents were modelled with GAFF parameters, and aqueous solvent was modelled with MSPC/E.

| KH                        |          |              |            | GAFF           |            |             |            | OPLS           |            |             |            |
|---------------------------|----------|--------------|------------|----------------|------------|-------------|------------|----------------|------------|-------------|------------|
| Solvent                   | Temp.    | Temp. Descr. | Datapoints | R <sup>2</sup> | RMSE       | Bias        | SDEP       | R <sup>2</sup> | RMSE       | Bias        | SDEP       |
| Chloroform<br>Carbon Tet. | 298K     | No           | 79         | 0.71(0.12)     | 1.35(0.29) | 0.04(0.32)  | 1.31(0.27) | 0.63(0.17)     | 1.55(0.34) | -0.09(0.36) | 1.50(0.34) |
|                           | 298K     | No           | 109        | 0.78(0.11)     | 0.76(0.19) | 0.01(0.21)  | 0.73(0.18) | 0.74(0.11)     | 0.85(0.16) | -0.05(0.21) | 0.82(0.15) |
| Water                     | 298K     | No           | 521        | 0.77(0.06)     | 1.96(0.27) | -0.04(0.25) | 1.94(0.26) | 0.73(0.05)     | 2.17(0.19) | -0.04(0.19) | 2.17(0.19) |
|                           | 273-373K | No           | 3053       | 0.62(0.08)     | 1.59(0.14) | 0.08(0.21)  | 1.58(0.14) | 0.66(0.08)     | 1.51(0.15) | 0.07(0.19)  | 1.50(0.15) |
| 273-373K                  | Yes      | Yes          | 3053       | 0.65(0.07)     | 1.55(0.15) | 0.10(0.18)  | 1.54(0.15) | 0.69(0.06)     | 1.43(0.16) | 0.06(0.22)  | 1.41(0.16) |
| Multi-solvent             | 298K     | No           | 709        | 0.64(0.08)     | 2.35(0.26) | -0.03(0.23) | 2.34(0.26) | 0.65(0.07)     | 2.27(0.25) | -0.07(0.25) | 2.26(0.25) |
|                           | 273-373K | No           | 3241       | -1.27(0.54)    | 4.33(0.30) | 3.16(0.45)  | 2.94(0.22) | -0.90(0.53)    | 3.91(0.33) | 2.84(0.43)  | 2.66(0.19) |
|                           | 273-373K | Yes          | 3241       | -1.25(0.61)    | 4.15(0.27) | 3.01(0.42)  | 2.84(0.18) | -0.96(0.53)    | 4.04(0.31) | 2.88(0.48)  | 2.80(0.18) |
|                           | 273-373K | No           | 3629       | 0.27(0.10)     | 3.31(0.21) | 1.20(0.25)  | 3.08(0.28) | 0.30(0.06)     | 3.27(0.16) | 1.55(0.17)  | 2.87(0.17) |
|                           | 273-373K | Yes          | 3629       | 0.31(0.11)     | 3.23(0.23) | 0.99(0.21)  | 3.07(0.27) | 0.29(0.07)     | 3.27(0.17) | 1.49(0.21)  | 2.91(0.15) |
| HNC                       |          |              |            | GAFF           |            |             |            | OPLS           |            |             |            |
| Solvent                   | Temp.    | Temp. Descr. | Datapoints | R <sup>2</sup> | RMSE       | Bias        | SDEP       | R <sup>2</sup> | RMSE       | Bias        | SDEP       |
| Chloroform<br>Carbon Tet. | 298K     | No           | 79         | 0.67(0.13)     | 1.42(0.25) | 0.00(0.39)  | 1.37(0.25) | 0.62(0.15)     | 1.60(0.33) | -0.06(0.36) | 1.56(0.32) |
|                           | 298K     | No           | 109        | 0.78(0.12)     | 0.76(0.17) | -0.03(0.21) | 0.74(0.16) | 0.77(0.10)     | 0.81(0.16) | 0.05(0.22)  | 0.78(0.16) |
| Water                     | 298K     | No           | 521        | 0.78(0.06)     | 1.96(0.26) | -0.07(0.20) | 1.95(0.26) | 0.74(0.06)     | 2.12(0.20) | -0.00(0.25) | 2.11(0.20) |
|                           | 273-373K | No           | 3053       | 0.61(0.08)     | 1.60(0.16) | 0.11(0.19)  | 1.59(0.17) | 0.64(0.07)     | 1.59(0.16) | 0.05(0.19)  | 1.55(0.16) |
| 273-373K                  | Yes      | Yes          | 3053       | 0.66(0.06)     | 1.53(0.13) | 0.11(0.22)  | 1.52(0.13) | 0.68(0.09)     | 1.47(0.19) | -0.01(0.21) | 1.45(0.18) |
| Multi-solvent             | 298K     | No           | 709        | 0.64(0.08)     | 2.33(0.23) | -0.04(0.20) | 2.32(0.23) | 0.67(0.06)     | 2.22(0.22) | -0.03(0.22) | 2.21(0.21) |
|                           | 273-373K | No           | 3241       | -1.38(0.72)    | 4.52(0.29) | 3.32(0.46)  | 3.05(0.25) | -1.32(0.61)    | 4.19(0.30) | 3.05(0.45)  | 2.84(0.24) |
|                           | 273-373K | Yes          | 3241       | -1.17(0.54)    | 4.22(0.30) | 3.03(0.42)  | 2.92(0.22) | -1.36(0.59)    | 4.36(0.29) | 3.21(0.43)  | 2.93(0.20) |
|                           | 273-373K | No           | 3629       | 0.28(0.12)     | 3.37(0.25) | 1.31(0.25)  | 3.09(0.30) | 0.28(0.07)     | 3.30(0.16) | 1.60(0.20)  | 2.88(0.14) |
|                           | 273-373K | Yes          | 3629       | 0.25(0.11)     | 3.36(0.22) | 1.02(0.17)  | 3.19(0.25) | 0.28(0.07)     | 3.31(0.17) | 1.46(0.23)  | 2.96(0.17) |
| GF                        |          |              |            | GAFF           |            |             |            | OPLS           |            |             |            |
| Solvent                   | Temp.    | Temp. Descr. | Datapoints | R <sup>2</sup> | RMSE       | Bias        | SDEP       | R <sup>2</sup> | RMSE       | Bias        | SDEP       |
| Chloroform<br>Carbon Tet. | 298K     | No           | 79         | 0.70(0.14)     | 1.40(0.36) | -0.03(0.33) | 1.36(0.35) | 0.69(0.16)     | 1.44(0.30) | 0.00(0.34)  | 1.40(0.29) |
|                           | 298K     | No           | 109        | 0.76(0.14)     | 0.82(0.24) | -0.01(0.24) | 0.79(0.24) | 0.81(0.09)     | 0.72(0.17) | -0.05(0.22) | 0.68(0.16) |
| Water                     | 298K     | No           | 521        | 0.78(0.05)     | 1.92(0.24) | -0.02(0.17) | 1.91(0.24) | 0.75(0.05)     | 2.07(0.19) | 0.02(0.22)  | 2.06(0.19) |
|                           | 273-373K | No           | 3053       | 0.64(0.08)     | 1.59(0.16) | 0.05(0.18)  | 1.58(0.16) | 0.66(0.09)     | 1.49(0.18) | 0.01(0.19)  | 1.47(0.17) |
| 273-373K                  | Yes      | Yes          | 3053       | 0.65(0.07)     | 1.49(0.14) | 0.01(0.20)  | 1.48(0.14) | 0.70(0.06)     | 1.42(0.17) | 0.03(0.17)  | 1.41(0.17) |
| Multi-solvent             | 298K     | No           | 709        | 0.67(0.08)     | 2.22(0.25) | 0.05(0.23)  | 2.21(0.25) | 0.68(0.05)     | 2.21(0.19) | -0.03(0.19) | 2.20(0.19) |
|                           | 273-373K | No           | 3241       | -1.21(0.55)    | 4.26(0.28) | 3.11(0.41)  | 2.89(0.22) | -0.51(0.38)    | 3.55(0.25) | 2.43(0.34)  | 2.57(0.19) |
|                           | 273-373K | Yes          | 3241       | -1.05(0.46)    | 4.17(0.31) | 3.03(0.42)  | 2.84(0.19) | -0.69(0.48)    | 3.77(0.30) | 2.66(0.39)  | 2.65(0.17) |
|                           | 273-373K | No           | 3629       | 0.34(0.12)     | 3.18(0.30) | 1.01(0.29)  | 2.99(0.36) | 0.32(0.06)     | 3.25(0.16) | 1.42(0.17)  | 2.91(0.17) |
|                           | 273-373K | Yes          | 3629       | 0.36(0.12)     | 3.14(0.26) | 0.84(0.22)  | 3.02(0.27) | 0.29(0.08)     | 3.30(0.18) | 1.33(0.27)  | 3.00(0.19) |

**Table 5** Solvation free energy predictions for all solvents using partial least squares models trained on KH, HNC and GF calculated descriptors. Predictions are separated by temperature, inclusion of a temperature descriptor, solute forcefield parameters and number of datapoints. Results for each model are taken from test set predictions. Units are in kcal/mol. Carbon Tet. refers to Carbon Tetrachloride. Organic solvents were modelled with GAFF parameters, and water solvent was modelled with MSPC/E. The standard deviation (SD) for each model statistic over 50 resamples is also shown.

## 4 Random Forest

| KH            |          |              |            | GAFF           |      |       |      | OPLS           |      |       |      |
|---------------|----------|--------------|------------|----------------|------|-------|------|----------------|------|-------|------|
| Solvent       | Temp.    | Temp. Descr. | Datapoints | R <sup>2</sup> | RMSE | Bias  | SDEP | R <sup>2</sup> | RMSE | Bias  | SDEP |
| Chloroform    | 298K     | No           | 79         | 0.65           | 1.38 | 0.00  | 1.32 | 0.58           | 1.54 | 0.00  | 1.48 |
| Carbon Tet.   | 298K     | No           | 109        | 0.67           | 0.88 | 0.03  | 0.83 | 0.77           | 0.73 | 0.03  | 0.69 |
| Water         | 298K     | No           | 521        | 0.85           | 1.50 | 0.02  | 1.48 | 0.80           | 1.88 | -0.01 | 1.86 |
|               | 273-373K | No           | 3053       | 0.70           | 1.45 | -0.03 | 1.42 | 0.60           | 1.67 | -0.05 | 1.63 |
|               | 273-373K | Yes          | 3053       | 0.70           | 1.44 | -0.04 | 1.41 | 0.61           | 1.63 | -0.06 | 1.60 |
| Multi-solvent | 298K     | No           | 709        | 0.83           | 1.61 | 0.00  | 1.60 | 0.76           | 1.89 | -0.03 | 1.88 |
|               | 273-373K | No           | 3241       | 0.69           | 1.51 | -0.05 | 1.48 | 0.64           | 1.63 | -0.08 | 1.60 |
|               | 273-373K | Yes          | 3241       | 0.69           | 1.50 | -0.07 | 1.47 | 0.64           | 1.62 | -0.09 | 1.60 |
|               | 273-373K | No           | 3629       | 0.76           | 1.52 | -0.02 | 1.49 | 0.67           | 1.80 | -0.11 | 1.75 |
|               | 273-373K | Yes          | 3629       | 0.77           | 1.51 | -0.01 | 1.48 | 0.68           | 1.79 | -0.11 | 1.75 |
| HNC           |          |              |            | GAFF           |      |       |      | OPLS           |      |       |      |
| Solvent       | Temp.    | Temp. Descr. | Datapoints | R <sup>2</sup> | RMSE | Bias  | SDEP | R <sup>2</sup> | RMSE | Bias  | SDEP |
| Chloroform    | 298K     | No           | 79         | 0.67           | 1.37 | -0.00 | 1.32 | 0.56           | 1.55 | -0.02 | 1.47 |
| Carbon Tet.   | 298K     | No           | 109        | 0.69           | 0.85 | 0.02  | 0.80 | 0.77           | 0.75 | 0.02  | 0.70 |
| Water         | 298K     | No           | 521        | 0.86           | 1.50 | 0.00  | 1.49 | 0.79           | 1.88 | -0.01 | 1.86 |
|               | 273-373K | No           | 3053       | 0.69           | 1.46 | -0.02 | 1.43 | 0.60           | 1.68 | -0.04 | 1.64 |
|               | 273-373K | Yes          | 3053       | 0.71           | 1.42 | -0.03 | 1.39 | 0.62           | 1.64 | -0.04 | 1.61 |
| Multi-solvent | 298K     | No           | 709        | 0.83           | 1.62 | 0.01  | 1.61 | 0.76           | 1.88 | -0.02 | 1.87 |
|               | 273-373K | No           | 3241       | 0.68           | 1.53 | -0.07 | 1.50 | 0.63           | 1.66 | -0.11 | 1.63 |
|               | 273-373K | Yes          | 3241       | 0.69           | 1.50 | -0.06 | 1.48 | 0.64           | 1.62 | -0.09 | 1.60 |
|               | 273-373K | No           | 3629       | 0.76           | 1.52 | -0.03 | 1.48 | 0.68           | 1.78 | -0.11 | 1.74 |
|               | 273-373K | Yes          | 3629       | 0.77           | 1.50 | -0.03 | 1.47 | 0.68           | 1.77 | -0.13 | 1.72 |
| GF            |          |              |            | GAFF           |      |       |      | OPLS           |      |       |      |
| Solvent       | Temp.    | Temp. Descr. | Datapoints | R <sup>2</sup> | RMSE | Bias  | SDEP | R <sup>2</sup> | RMSE | Bias  | SDEP |
| Chloroform    | 298K     | No           | 79         | 0.57           | 1.55 | -0.02 | 1.48 | 0.50           | 1.70 | -0.03 | 1.63 |
| Carbon Tet.   | 298K     | No           | 109        | 0.50           | 1.09 | 0.01  | 1.03 | 0.70           | 0.85 | 0.02  | 0.79 |
| Water         | 298K     | No           | 521        | 0.87           | 1.50 | 0.01  | 1.49 | 0.80           | 1.83 | -0.02 | 1.82 |
|               | 273-373K | No           | 3053       | 0.71           | 1.42 | -0.04 | 1.39 | 0.64           | 1.59 | -0.06 | 1.56 |
|               | 273-373K | Yes          | 3053       | 0.70           | 1.44 | -0.04 | 1.41 | 0.63           | 1.63 | -0.04 | 1.58 |
| Multi-solvent | 298K     | No           | 709        | 0.82           | 1.64 | 0.01  | 1.63 | 0.77           | 1.86 | -0.03 | 1.85 |
|               | 273-373K | No           | 3241       | 0.69           | 1.51 | -0.08 | 1.47 | 0.66           | 1.60 | -0.08 | 1.57 |
|               | 273-373K | Yes          | 3241       | 0.69           | 1.50 | -0.05 | 1.46 | 0.66           | 1.57 | -0.08 | 1.54 |
|               | 273-373K | No           | 3629       | 0.76           | 1.53 | -0.03 | 1.50 | 0.69           | 1.76 | -0.11 | 1.71 |
|               | 273-373K | Yes          | 3629       | 0.77           | 1.50 | -0.03 | 1.47 | 0.70           | 1.73 | -0.10 | 1.69 |

**Table 6** Solvation free energy predictions taken from RF models using KH, HNC and GF calculated descriptors, OPLS and GAFF parameters and temperature descriptors. Results shown are the average five-fold cross validation test set statistics within each resample, averaged over the number of resamples run for each model. Carbon Tet. refers to Carbon Tetrachloride. Organic solvents were modelled with GAFF parameters, and aqueous solvent was modelled with MSPC/E.

| KH                        |          |              |            | GAFF           |            |             |            | OPLS           |            |             |            |
|---------------------------|----------|--------------|------------|----------------|------------|-------------|------------|----------------|------------|-------------|------------|
| Solvent                   | Temp.    | Temp. Descr. | Datapoints | R <sup>2</sup> | RMSE       | Bias        | SDEP       | R <sup>2</sup> | RMSE       | Bias        | SDEP       |
| Chloroform<br>Carbon Tet. | 298K     | No           | 79         | 0.66(0.14)     | 1.45(0.25) | 0.02(0.35)  | 1.41(0.24) | 0.63(0.13)     | 1.56(0.24) | -0.04(0.31) | 1.53(0.24) |
|                           | 298K     | No           | 109        | 0.70(0.13)     | 0.91(0.17) | 0.02(0.25)  | 0.88(0.16) | 0.78(0.09)     | 0.75(0.14) | -0.02(0.23) | 0.72(0.14) |
| Water                     | 298K     | No           | 521        | 0.86(0.03)     | 1.53(0.19) | -0.01(0.17) | 1.53(0.18) | 0.78(0.04)     | 1.90(0.20) | -0.00(0.26) | 1.89(0.19) |
|                           | 273-373K | No           | 3053       | 0.69(0.07)     | 1.45(0.20) | 0.05(0.21)  | 1.44(0.20) | 0.65(0.05)     | 1.56(0.15) | 0.06(0.23)  | 1.54(0.15) |
|                           | 273-373K | Yes          | 3053       | 0.70(0.07)     | 1.39(0.19) | 0.04(0.17)  | 1.37(0.19) | 0.65(0.08)     | 1.57(0.25) | 0.03(0.21)  | 1.56(0.25) |
| Multi-solvent             | 298K     | No           | 709        | 0.82(0.03)     | 1.65(0.14) | 0.01(0.19)  | 1.64(0.14) | 0.76(0.03)     | 1.94(0.18) | -0.01(0.21) | 1.93(0.17) |
|                           | 273-373K | No           | 3241       | 0.23(0.34)     | 2.50(0.45) | 1.02(0.50)  | 2.25(0.32) | 0.47(0.18)     | 2.12(0.31) | 0.49(0.40)  | 2.03(0.26) |
|                           | 273-373K | Yes          | 3241       | 0.31(0.23)     | 2.37(0.35) | 0.94(0.39)  | 2.16(0.26) | 0.44(0.17)     | 2.14(0.30) | 0.49(0.38)  | 2.06(0.25) |
|                           | 273-373K | No           | 3629       | 0.75(0.05)     | 1.93(0.22) | 0.37(0.14)  | 1.89(0.21) | 0.66(0.04)     | 2.30(0.16) | 0.49(0.19)  | 2.24(0.14) |
|                           | 273-373K | Yes          | 3629       | 0.76(0.04)     | 1.91(0.17) | 0.39(0.15)  | 1.87(0.16) | 0.67(0.04)     | 2.27(0.16) | 0.45(0.17)  | 2.22(0.15) |
| HNC                       |          |              |            | GAFF           |            |             |            | OPLS           |            |             |            |
| Solvent                   | Temp.    | Temp. Descr. | Datapoints | R <sup>2</sup> | RMSE       | Bias        | SDEP       | R <sup>2</sup> | RMSE       | Bias        | SDEP       |
| Chloroform<br>Carbon Tet. | 298K     | No           | 79         | 0.66(0.10)     | 1.45(0.18) | -0.00(0.33) | 1.41(0.17) | 0.64(0.11)     | 1.53(0.28) | 0.01(0.38)  | 1.49(0.27) |
|                           | 298K     | No           | 109        | 0.71(0.12)     | 0.91(0.16) | 0.04(0.27)  | 0.86(0.16) | 0.77(0.09)     | 0.78(0.13) | 0.05(0.25)  | 0.74(0.12) |
| Water                     | 298K     | No           | 521        | 0.85(0.03)     | 1.62(0.14) | -0.04(0.17) | 1.61(0.14) | 0.80(0.03)     | 1.88(0.18) | -0.03(0.22) | 1.86(0.17) |
|                           | 273-373K | No           | 3053       | 0.71(0.07)     | 1.40(0.18) | 0.03(0.22)  | 1.38(0.17) | 0.67(0.07)     | 1.51(0.20) | 0.03(0.19)  | 1.50(0.20) |
|                           | 273-373K | Yes          | 3053       | 0.70(0.07)     | 1.45(0.21) | 0.03(0.23)  | 1.43(0.20) | 0.66(0.07)     | 1.51(0.17) | -0.02(0.22) | 1.49(0.17) |
| Multi-solvent             | 298K     | No           | 709        | 0.82(0.03)     | 1.64(0.17) | 0.01(0.20)  | 1.63(0.17) | 0.76(0.03)     | 1.93(0.16) | -0.03(0.20) | 1.92(0.15) |
|                           | 273-373K | No           | 3241       | 0.23(0.30)     | 2.50(0.34) | 1.05(0.41)  | 2.24(0.25) | 0.50(0.18)     | 2.06(0.33) | 0.41(0.43)  | 1.98(0.28) |
|                           | 273-373K | Yes          | 3241       | 0.27(0.25)     | 2.45(0.36) | 1.04(0.38)  | 2.19(0.30) | 0.45(0.18)     | 2.10(0.29) | 0.44(0.42)  | 2.02(0.24) |
|                           | 273-373K | No           | 3629       | 0.76(0.04)     | 1.92(0.19) | 0.39(0.16)  | 1.87(0.17) | 0.65(0.04)     | 2.33(0.19) | 0.49(0.20)  | 2.26(0.17) |
|                           | 273-373K | Yes          | 3629       | 0.76(0.05)     | 1.91(0.20) | 0.40(0.17)  | 1.86(0.18) | 0.66(0.03)     | 2.25(0.15) | 0.47(0.18)  | 2.20(0.14) |
| GF                        |          |              |            | GAFF           |            |             |            | OPLS           |            |             |            |
| Solvent                   | Temp.    | Temp. Descr. | Datapoints | R <sup>2</sup> | RMSE       | Bias        | SDEP       | R <sup>2</sup> | RMSE       | Bias        | SDEP       |
| Chloroform<br>Carbon Tet. | 298K     | No           | 79         | 0.60(0.13)     | 1.62(0.29) | -0.03(0.40) | 1.57(0.29) | 0.54(0.12)     | 1.70(0.21) | -0.06(0.37) | 1.66(0.22) |
|                           | 298K     | No           | 109        | 0.57(0.11)     | 1.13(0.15) | 0.06(0.28)  | 1.10(0.14) | 0.72(0.10)     | 0.87(0.15) | 0.00(0.25)  | 0.83(0.14) |
| Water                     | 298K     | No           | 521        | 0.87(0.02)     | 1.52(0.15) | -0.00(0.17) | 1.51(0.14) | 0.80(0.04)     | 1.88(0.20) | -0.05(0.23) | 1.86(0.20) |
|                           | 273-373K | No           | 3053       | 0.70(0.07)     | 1.41(0.21) | 0.07(0.19)  | 1.40(0.21) | 0.67(0.05)     | 1.48(0.12) | -0.00(0.17) | 1.47(0.12) |
|                           | 273-373K | Yes          | 3053       | 0.71(0.06)     | 1.38(0.18) | 0.08(0.17)  | 1.37(0.18) | 0.68(0.08)     | 1.44(0.17) | -0.01(0.19) | 1.43(0.17) |
| Multi-solvent             | 298K     | No           | 709        | 0.82(0.03)     | 1.65(0.14) | 0.02(0.17)  | 1.64(0.14) | 0.77(0.04)     | 1.87(0.16) | -0.04(0.17) | 1.86(0.16) |
|                           | 273-373K | No           | 3241       | 0.29(0.26)     | 2.36(0.33) | 0.95(0.36)  | 2.14(0.27) | 0.43(0.19)     | 2.19(0.32) | 0.61(0.48)  | 2.06(0.25) |
|                           | 273-373K | Yes          | 3241       | 0.32(0.28)     | 2.33(0.40) | 0.93(0.41)  | 2.11(0.32) | 0.40(0.17)     | 2.17(0.30) | 0.57(0.40)  | 2.07(0.25) |
|                           | 273-373K | No           | 3629       | 0.76(0.04)     | 1.92(0.16) | 0.37(0.16)  | 1.88(0.15) | 0.65(0.04)     | 2.30(0.18) | 0.47(0.20)  | 2.24(0.16) |
|                           | 273-373K | Yes          | 3629       | 0.76(0.04)     | 1.92(0.16) | 0.43(0.15)  | 1.86(0.15) | 0.66(0.05)     | 2.28(0.22) | 0.47(0.20)  | 2.22(0.19) |

**Table 7** Solvation free energy predictions for all solvents using random forest models trained on KH, HNC and GF calculated descriptors. Predictions are separated by temperature, inclusion of a temperature descriptor, solute forcefield parameters and number of datapoints. Results for each model are taken from test set predictions. Units are in kcal/mol. Carbon Tet. refers to Carbon Tetrachloride. Organic solvents were modelled with GAFF parameters, and water solvent was modelled with MSPC/E. The standard deviation (SD) for each model statistic over 50 resamples is also shown.
